# Supplementary material
Source: HighWire-hosted journal article supplement (https://bmjopen.bmj.com/content/10/10/e036904)
Supplement: inline-supplementary-material-2 [file inline-supplementary-material-2.pdf]

## Appendix B

Table 4. Excluded studies and reasons for exclusion

| <b>Study</b>                  | <b>Reason for exclusion</b>                                                                                                                                                                                                          |
|-------------------------------|--------------------------------------------------------------------------------------------------------------------------------------------------------------------------------------------------------------------------------------|
| Liddy et al. (2008)           | Not meeting definition of multi-morbidity (risk for functional decline or physical deterioration)                                                                                                                                    |
| Bowles et al. (2009)          | Not meeting definition of multi-morbidity (heart failure or diabetes)                                                                                                                                                                |
| Takahashi et al. (2010)       | Not meeting definition of multi-morbidity (Mayo Clinic Elder Risk Assessment scores)                                                                                                                                                 |
| Takahashi et al. (2012)       | Not meeting definition of multi-morbidity (Elder Risk Assessment Index)                                                                                                                                                              |
| Schweier et al. (2014)        | Not meeting definition of multi-morbidity (Coronary Heart Disease or chronic back pain)                                                                                                                                              |
| Looman et al. (2015)          | Not meeting definition of multi-morbidity (children with medical complexity)                                                                                                                                                         |
| Donate-Martinez et al. (2016) | Not meeting definition of multi-morbidity (older adults with chronic conditions at high or moderate risk of hospital admissions)                                                                                                     |
| Foley et al. (2016)           | Not meeting definition of multi-morbidity (BMI of 30.0–44.9 kg/m <sup>2</sup> and a current diagnosis of hyper-tension, type 2 diabetes, and/or hyperlipidaemia)                                                                     |
| Or et al. (2016)              | Not meeting definition of multi-morbidity (type 2 diabetes mellitus and/or hypertension)                                                                                                                                             |
| Bender et al. (2017)          | Not meeting definition for multi-morbidity (diabetes type 2 and BMI $\geq$ 23)                                                                                                                                                       |
| Lambert et al. (2017)         | No RCT (conference abstract)                                                                                                                                                                                                         |
| Bakas et al. (2018)           | Not meeting definition of multi-morbidity (healthy older adults included)                                                                                                                                                            |
| Looman et al. (2018)          | Not meeting definition of multi-morbidity (children with medical complexity)                                                                                                                                                         |
| Sewick et al. (2018)          | Study protocol                                                                                                                                                                                                                       |
| Valdivieso et al. (2018)      | Not meeting definition of multi-morbidity (high complexity, according to having a probability >98% of using more than 10 non-planned admissions in the following 12 months according to the score of the GeChronic predictive model) |
| Choudry et al. (2019)         | Not meeting definition of multi-morbidity (hyperlipidaemia, hyper-tension, or diabetes)                                                                                                                                              |
